# More than meets the Kappa for Antibody Superantigen Protein L (PpL)

1 Wei-Li Ling<sup>1,2</sup>, Joshua Yi Yeo<sup>1</sup>, Yuen-Ling Ng<sup>2</sup>, Anil Wipat<sup>3</sup>, Samuel Ken-En Gan<sup>\*1,4</sup>

2

3 <sup>1</sup> Antibody & Product Development Lab, Experimental Drug Development Centre – Bioinformatics  
4 Institute, Agency for Science, Technology and Research (A\*STAR), Singapore, Singapore

5

6 <sup>2</sup> Newcastle Research and Innovation Institute (NewRIIS), Singapore, Singapore

7 <sup>3</sup> School of Computing, Newcastle University, Newcastle upon Tyne, UK

8 <sup>4</sup> James Cook University, Singapore, Singapore

9

10 \* **Correspondence:**

11 Samuel Ken-En Gan

12 samgan@apdskeg.com; samuel\_gan@eddc.a-star.edu.sg

13 **Keywords: Pertuzumab, Trastuzumab, IgG1, VH families, VK families, Protein L, Protein A,**  
14 **Protein G, Immunoglobulin Superantigen.**

15

16 **Abstract**

17 Immunoglobulin superantigens play an important role in the affinity purification of antibodies  
18 and underlie the microbiota-immune axis at mucosal areas Focussing on the *Staphylococcal* Protein  
19 A (SpA), *Streptococcal* Protein G (SpG), and the *Fingoldia* Protein L (PpL) that were previously  
20 thought to bind to only specific regions of human antibodies, a systematic and holistic analysis of the  
21 antibody regions using 63 antibody permutations involving six V $\kappa$  and seven VH region IgG1  
22 revealed showed novel PpL-antibody interactions. While SpA and SpG showed relatively consistent  
23 interactions with the antibodies, our findings showed PpL binding to certain VH-V $\kappa$ 2, 5 and 6  
24 interactions had contribution by other antibody regions. The findings of this have implications on  
25 PpL-based affinity antibody purifications and antibody design as well as provides novel insights to  
26 PpL-based microbiota-immune axis effects.

27

28 **1 Introduction**

29 B-cell superantigens bind antibodies or immunoglobulins (Ig) to hyperstimulate populations of  
30 B-cells independent of T-cells and have been widely used for antibody affinity purification  
31 (Deacy et al., 2021). Superantigens are predominantly produced by microorganisms as a defence

32 mechanism to escape from the host immune system (Spaulding et al., 2013). Notably there are three  
33 widely-used antibody superantigens also known as immunoglobulin binding proteins (IBP): Protein  
34 G (SpG) which binds the heavy chain constant region of the IgG subtypes (IgG1-4) and is produced  
35 the by groups C and G of *Streptococcal* bacteria (Sjöbring et al., 1991); Protein A (SpA) produced by  
36 *Staphylococcus aureus* which also binds to the heavy chain constant region of IgG1, 2, and 4 and  
37 also the variable heavy (VH) 3 framework (VH3) (GROV et al., 1964;Sasso et al., 1991;Su et al.,  
38 2021); and Protein L (PpL) produced by *Fingoldia magna* (previously known as *Peptostreptococcus*  
39 *magnus*) which binds to the variable light kappa  $\kappa$  (V $\kappa$ ) chain families 1,3,4 (Nilson et al., 1992) at  
40 the framework (FWR) 1 region with influence by the other regions (Su et al., 2017).

41 When bound to the antibodies, these superantigens can reduce the binding of the antibodies to  
42 their antigen (Ling et al., 2021), possibly reducing avidity through steric hindrances as in the case of  
43 IgM (Samsudin et al., 2020), cause unwanted activation (Su et al., 2021) with downstream effects  
44 depending on their isotype (discussed in (Ling et al., 2020a;Gan, 2021)).

45 With both IgG and V $\kappa$  as the predominant isotypes in humans (Haraldsson et al., 1991;Janeway  
46 et al., 2001), superantigen proteins A, G, and L are likely to underlie significant microbiota-immune  
47 axis interactions especially at colonization of mucosal areas. Nonetheless, the problem extends to  
48 antibody purification process at which these superantigens are often used. Considering that most  
49 therapeutic antibodies are of the IgG and  $\kappa$  isotypes, unwanted interactions of such superantigens  
50 produced by commensals at the natural colonization sites can influence the microbiota-immune axis.

51 Given the widespread implications of these three superantigens, a holistic (Phua et al.,  
52 2019;Ling et al., 2020a) and systematic antibody-superantigen investigation using 63 of our  
53 previously engineered antibodies (Ling et al., 2018;Lua et al., 2018;Ling et al., 2020b) was  
54 performed involving six V $\kappa$  and seven VH IgGs finding novel interactions for PpL but not for SpA  
55 and SpG.

56

## 57 **2 Materials and Methods**

### 58 **2.1 Recombinant Antibody Production**

59 All Trastuzumab and Pertuzumab VH and V $\kappa$  sequences used were described previously  
60 (Ling et al., 2018;Ling et al., 2020b). Briefly, the genes were sub-cloned into pTT5 vector (Youbio,  
61 Cat: VT2202) using restriction enzyme sites, as previously performed (Su et al., 2017;Ling et al.,  
62 2018;Lua et al., 2018;Lua et al., 2019a;Ling et al., 2020b). The plasmids were transformed into  
63 competent *E. coli* (DH5 $\alpha$ ) strains (Chan et al., 2013) followed by plasmid extraction (Biobasic Pte  
64 Ltd, Cat: BS614).

65 Transfection, production, and purification and were performed as described previously (Ling  
66 et al., 2018;Ling et al., 2020b).

67

### 68 **2.2 Binding Affinity Quantification**

69 Measurements of superantigen  $k_a$  and  $k_d$  using the OctetRed® were performed using PpL  
70 (Sartorius, Cat: 18-5185), SpA (Sartorius, Cat: 18-5012), and SpG (Sartorius, Cat: 18- 18-5083)

71 biosensor to Pertuzumab and Trastuzumab IgG1 variants in solution. The program and steps used  
72 were as previously described (Su et al., 2017;Ling et al., 2018;Lua et al., 2018;Su et al., 2018;Lua et  
73 al., 2019b;Ling et al., 2020b;Su et al., 2021).

74

75

## 76 **3 Results**

### 77 **3.1 Bio-Layer Interferometry (BLI) measurement of recombinant IgG1 variants to Protein A** 78 **(SpA)**

| Pertuzumab variants binding Protein A |                           |                             |                             | Trastuzumab variants binding Protein A |                           |                             |                             |              |       |      |
|---------------------------------------|---------------------------|-----------------------------|-----------------------------|----------------------------------------|---------------------------|-----------------------------|-----------------------------|--------------|-------|------|
| Variable Pairings                     | KD (M, 10 <sup>-9</sup> ) | ka (1/Ms, 10 <sup>4</sup> ) | kd (1/s, 10 <sup>-4</sup> ) | Variable Pairings                      | KD (M, 10 <sup>-9</sup> ) | ka (1/Ms, 10 <sup>4</sup> ) | kd (1/s, 10 <sup>-4</sup> ) |              |       |      |
| κ1-H1                                 | 1.58                      | 37.79                       | 5.92                        | κ1-H1                                  | Not Produced              | Not Produced                | Not Produced                |              |       |      |
| κ1-H2                                 | 1.58                      | 41.43                       | 6.56                        | κ1-H2                                  |                           |                             |                             |              |       |      |
| κ1-H3                                 | 0.64                      | 53.29                       | 3.26                        | κ1-H3                                  |                           |                             |                             |              |       |      |
| κ1-H4                                 | 1.56                      | 38.64                       | 6.01                        | κ1-H4                                  |                           |                             |                             |              |       |      |
| κ1-H5                                 | Not Produced              |                             |                             | κ1-H5                                  |                           |                             |                             | 1.06         | 29.07 | 3.07 |
| κ1-H6                                 | Not Produced              |                             |                             | κ1-H6                                  |                           |                             |                             | Not Produced |       |      |
| κ1-H7                                 | 1.17                      | 42.74                       | 5.02                        | κ1-H7                                  | 0.66                      | 44.31                       | 2.93                        |              |       |      |
| κ2-H1                                 | 1.90                      | 33.08                       | 6.32                        | κ2-H1                                  | 1.49                      | 17.97                       | 2.68                        |              |       |      |
| κ2-H2                                 | 1.82                      | 35.57                       | 6.47                        | κ2-H2                                  | 1.46                      | 17.32                       | 2.14                        |              |       |      |
| κ2-H3                                 | 0.76                      | 55.68                       | 4.23                        | κ2-H3                                  | 0.24                      | 45.66                       | 1.08                        |              |       |      |
| κ2-H4                                 | 1.57                      | 36.21                       | 5.68                        | κ2-H4                                  | 1.29                      | 35.58                       | 4.51                        |              |       |      |
| κ2-H5                                 | 1.62                      | 35.83                       | 5.82                        | κ2-H5                                  | 1.11                      | 60.04                       | 6.64                        |              |       |      |
| κ2-H6                                 | 1.55                      | 38.00                       | 5.91                        | κ2-H6                                  | 1.79                      | 25.36                       | 4.51                        |              |       |      |
| κ2-H7                                 | 1.15                      | 47.37                       | 5.44                        | κ2-H7                                  | 0.53                      | 57.16                       | 3.04                        |              |       |      |
| κ3-H1                                 | 1.06                      | 37.25                       | 3.92                        | κ3-H1                                  | 0.25                      | 45.00                       | 1.08                        |              |       |      |
| κ3-H2                                 | 1.57                      | 40.11                       | 6.30                        | κ3-H2                                  | 1.67                      | 32.31                       | 5.36                        |              |       |      |
| κ3-H3                                 | 0.69                      | 58.94                       | 4.07                        | κ3-H3                                  | 1.12                      | 20.69                       | 2.31                        |              |       |      |
| κ3-H4                                 | 1.50                      | 36.19                       | 5.45                        | κ3-H4                                  | 2.30                      | 23.37                       | 5.33                        |              |       |      |
| κ3-H5                                 | 1.57                      | 39.18                       | 6.18                        | κ3-H5                                  | 0.53                      | 64.07                       | 3.25                        |              |       |      |
| κ3-H6                                 | 1.43                      | 42.28                       | 6.04                        | κ3-H6                                  | 0.25                      | 45.00                       | 1.08                        |              |       |      |
| κ3-H7                                 | 1.12                      | 44.12                       | 4.93                        | κ3-H7                                  | 1.67                      | 32.31                       | 5.36                        |              |       |      |
| κ4-H1                                 | 1.70                      | 37.79                       | 6.43                        | κ4-H1                                  | 1.95                      | 18.22                       | 3.55                        |              |       |      |
| κ4-H2                                 | 1.46                      | 39.39                       | 5.77                        | κ4-H2                                  | Not Produced              |                             |                             |              |       |      |
| κ4-H3                                 | 0.58                      | 43.12                       | 2.46                        | κ4-H3                                  | 0.25                      | 45.00                       | 1.08                        |              |       |      |
| κ4-H4                                 | 1.61                      | 36.02                       | 5.73                        | κ4-H4                                  | 1.67                      | 32.31                       | 5.36                        |              |       |      |
| κ4-H5                                 | 1.88                      | 34.13                       | 6.40                        | κ4-H5                                  | 1.12                      | 20.69                       | 2.31                        |              |       |      |
| κ4-H6                                 | 1.85                      | 31.10                       | 5.76                        | κ4-H6                                  | 2.30                      | 23.37                       | 5.33                        |              |       |      |
| κ4-H7                                 | 1.33                      | 36.54                       | 4.85                        | κ4-H7                                  | 0.53                      | 64.07                       | 3.25                        |              |       |      |
| κ5-H1                                 | Not Produced              |                             |                             | κ5-H1                                  | Not Produced              |                             |                             |              |       |      |
| κ5-H2                                 | Not Produced              |                             |                             | κ5-H2                                  | Not Produced              |                             |                             |              |       |      |
| κ5-H3                                 | 0.94                      | 18.65                       | 1.74                        | κ5-H3                                  | 0.72                      | 24.60                       | 1.74                        |              |       |      |
| κ5-H4                                 | Not Produced              |                             |                             | κ5-H4                                  | Not Produced              |                             |                             |              |       |      |
| κ5-H5                                 | Not Produced              |                             |                             | κ5-H5                                  | Not Produced              |                             |                             |              |       |      |
| κ5-H6                                 | Not Produced              |                             |                             | κ5-H6                                  | Not Produced              |                             |                             |              |       |      |
| κ5-H7                                 | 1.30                      | 34.41                       | 4.49                        | κ5-H7                                  | Not Produced              |                             |                             |              |       |      |
| κ6-H1                                 | 0.94                      | 33.10                       | 3.29                        | κ6-H1                                  | 0.57                      | 27.22                       | 1.52                        |              |       |      |
| κ6-H2                                 | 0.79                      | 36.64                       | 2.93                        | κ6-H2                                  | Not Produced              |                             |                             |              |       |      |
| κ6-H3                                 | 0.41                      | 47.42                       | 2.12                        | κ6-H3                                  | 0.31                      | 42.43                       | 1.31                        |              |       |      |
| κ6-H4                                 | 0.81                      | 36.58                       | 2.64                        | κ6-H4                                  | 1.80                      | 21.44                       | 3.86                        |              |       |      |
| κ6-H5                                 | 1.26                      | 46.77                       | 5.85                        | κ6-H5                                  | 0.84                      | 83.03                       | 6.97                        |              |       |      |
| κ6-H6                                 | Not Produced              |                             |                             | κ6-H6                                  | 1.78                      | 34.99                       | 6.15                        |              |       |      |
| κ6-H7                                 | 0.98                      | 49.74                       | 4.85                        | κ6-H7                                  | 0.60                      | 50.44                       | 2.98                        |              |       |      |

79

80 Figure 1. BLI measurements (KD, ka and kd) of Pertuzumab and Trastuzumab Vκ1-6 and VH1-7  
 81 permutation binding to immobilized SpA biosensor. “Not Produced” denotes that there was  
 82 insufficient antibody production for the variant despite numerous large-scale transfections. All  
 83 readings were obtained from at least three antibody concentrations. The readings were the average of  
 84 independent triplicates.

85 To examine the potential holistic effect of V $\kappa$ 1-6 pairing with VH1-7 on antibody interactions  
86 with SpA, recombinant Pertuzumab and Trastuzumab IgG1 variants of the various pairings were  
87 studied. It should be noted that SpA is known to bind to the CH2 and CH3 of the heavy chain  
88 constant (CH).

89 From Figure 1, the Pertuzumab and Trastuzumab IgG1 variants showed measurements bound  
90 to SpA with the equilibrium dissociation constant (KD) at  $0.41 - 1.90 \times 10^{-9}$  M and  $0.25 - 2.30 \times 10^{-9}$   
91 M, respectively.

92 For both Pertuzumab and Trastuzumab variants binding to SpA, VH3 was noticed to have a  
93 slightly lower, albeit insignificant KD difference at the average of  $\sim 0.57 \times 10^{-9}$  M and  $\sim 0.53 \times 10^{-9}$   
94 M, respectively, when compared to the other VH families paired with the same V $\kappa$  family. This  
95 phenomenon is attributed to the higher  $k_a$  and lower  $k_d$  for the VH3 variant.

96

97 **3.2 Bio-Layer Interferometry (BLI) measurement of recombinant IgG1 variants to Protein G**  
98 **(SpG)**

| Pertuzumab variants binding Protein G |                           |                             |                             | Trastuzumab variants binding Protein G |                           |                             |                             |
|---------------------------------------|---------------------------|-----------------------------|-----------------------------|----------------------------------------|---------------------------|-----------------------------|-----------------------------|
| Variable Pairings                     | KD (M, 10 <sup>-9</sup> ) | ka (1/Ms, 10 <sup>4</sup> ) | kd (1/s, 10 <sup>-4</sup> ) | Variable Pairings                      | KD (M, 10 <sup>-9</sup> ) | ka (1/Ms, 10 <sup>4</sup> ) | kd (1/s, 10 <sup>-4</sup> ) |
| κ1-H1                                 | 0.28                      | 33.22                       | 0.92                        | κ1-H1                                  | Not Produced              |                             |                             |
| κ1-H2                                 | 0.31                      | 32.59                       | 1.02                        | κ1-H2                                  |                           |                             |                             |
| κ1-H3                                 | 0.87                      | 30.74                       | 2.22                        | κ1-H3                                  |                           |                             |                             |
| κ1-H4                                 | 0.30                      | 35.54                       | 1.04                        | κ1-H4                                  |                           |                             |                             |
| κ1-H5                                 | Not Produced              |                             |                             | κ1-H5                                  | 0.29                      | 32.31                       | 0.91                        |
| κ1-H6                                 | Not Produced              |                             |                             | κ1-H6                                  | Not Produced              |                             |                             |
| κ1-H7                                 | 0.38                      | 29.75                       | 1.12                        | κ1-H7                                  | 0.39                      | 30.19                       | 1.16                        |
| κ2-H1                                 | 0.33                      | 29.12                       | 0.96                        | κ2-H1                                  | 0.39                      | 25.84                       | 1.00                        |
| κ2-H2                                 | 0.36                      | 29.18                       | 1.05                        | κ2-H2                                  | 0.69                      | 22.85                       | 1.57                        |
| κ2-H3                                 | 0.38                      | 31.21                       | 1.16                        | κ2-H3                                  | 0.29                      | 34.26                       | 0.98                        |
| κ2-H4                                 | 0.25                      | 34.56                       | 0.83                        | κ2-H4                                  | 0.28                      | 43.48                       | 1.15                        |
| κ2-H5                                 | 0.30                      | 28.66                       | 0.86                        | κ2-H5                                  | 0.27                      | 37.63                       | 0.97                        |
| κ2-H6                                 | 0.32                      | 30.00                       | 0.95                        | κ2-H6                                  | 0.33                      | 25.29                       | 0.84                        |
| κ2-H7                                 | 0.36                      | 30.31                       | 1.06                        | κ2-H7                                  | 0.23                      | 33.30                       | 0.77                        |
| κ3-H1                                 | 0.27                      | 35.41                       | 0.90                        | κ3-H1                                  | 0.31                      | 30.26                       | 0.92                        |
| κ3-H2                                 | 0.32                      | 31.47                       | 0.98                        | κ3-H2                                  | 0.48                      | 32.91                       | 1.55                        |
| κ3-H3                                 | 0.30                      | 31.52                       | 0.94                        | κ3-H3                                  | 0.24                      | 31.94                       | 0.78                        |
| κ3-H4                                 | 0.24                      | 35.67                       | 0.86                        | κ3-H4                                  | 0.36                      | 26.85                       | 0.97                        |
| κ3-H5                                 | 0.23                      | 30.77                       | 0.72                        | κ3-H5                                  | 0.23                      | 35.48                       | 0.81                        |
| κ3-H6                                 | 0.32                      | 30.40                       | 0.95                        | κ3-H6                                  | 0.44                      | 32.45                       | 1.42                        |
| κ3-H7                                 | 0.27                      | 29.36                       | 0.78                        | κ3-H7                                  | 0.29                      | 29.15                       | 0.86                        |
| κ4-H1                                 | 0.25                      | 30.68                       | 0.76                        | κ4-H1                                  | 0.36                      | 25.16                       | 0.89                        |
| κ4-H2                                 | 0.25                      | 32.17                       | 0.78                        | κ4-H2                                  | Not Produced              |                             |                             |
| κ4-H3                                 | 0.25                      | 30.90                       | 0.75                        | κ4-H3                                  | 0.23                      | 33.18                       | 0.75                        |
| κ4-H4                                 | 0.25                      | 34.25                       | 0.79                        | κ4-H4                                  | 0.25                      | 35.90                       | 0.89                        |
| κ4-H5                                 | 0.32                      | 26.48                       | 0.83                        | κ4-H5                                  | 0.22                      | 34.78                       | 0.76                        |
| κ4-H6                                 | 0.27                      | 27.33                       | 0.75                        | κ4-H6                                  | 0.38                      | 23.19                       | 0.87                        |
| κ4-H7                                 | 0.28                      | 28.25                       | 0.81                        | κ4-H7                                  | 0.23                      | 37.89                       | 0.82                        |
| κ5-H1                                 | Not Produced              |                             |                             | κ5-H1                                  | Not Produced              |                             |                             |
| κ5-H2                                 | Not Produced              |                             |                             | κ5-H2                                  | Not Produced              |                             |                             |
| κ5-H3                                 | 0.34                      | 28.58                       | 0.93                        | κ5-H3                                  | 0.32                      | 26.71                       | 0.84                        |
| κ5-H4                                 | Not Produced              |                             |                             | κ5-H4                                  | Not Produced              |                             |                             |
| κ5-H5                                 | Not Produced              |                             |                             | κ5-H5                                  | Not Produced              |                             |                             |
| κ5-H6                                 | Not Produced              |                             |                             | κ5-H6                                  | Not Produced              |                             |                             |
| κ5-H7                                 | 0.32                      | 31.62                       | 1.01                        | κ5-H7                                  | Not Produced              |                             |                             |
| κ6-H1                                 | 0.29                      | 30.14                       | 0.87                        | κ6-H1                                  | 0.32                      | 28.24                       | 0.89                        |
| κ6-H2                                 | 0.31                      | 31.57                       | 0.93                        | κ6-H2                                  | Not Produced              |                             |                             |
| κ6-H3                                 | 0.28                      | 36.72                       | 1.00                        | κ6-H3                                  | 0.27                      | 30.80                       | 0.86                        |
| κ6-H4                                 | 0.27                      | 37.20                       | 0.95                        | κ6-H4                                  | 0.36                      | 26.91                       | 0.97                        |
| κ6-H5                                 | 0.26                      | 33.74                       | 0.81                        | κ6-H5                                  | 0.22                      | 41.89                       | 0.90                        |
| κ6-H6                                 | Not Produced              |                             |                             | κ6-H6                                  | 1.78                      | 34.99                       | 0.51                        |
| κ6-H7                                 | 0.28                      | 33.32                       | 0.89                        | κ6-H7                                  | 0.30                      | 31.67                       | 0.93                        |

99

100 Figure 2. BLI measurements (KD, ka and kd) of Pertuzumab and Trastuzumab Vκ1-6 and VH1-7  
 101 permutation binding to immobilized SpG biosensor. “Not Produced” denotes that there was  
 102 insufficient antibody production for the variants despite numerous large-scale transfections. All  
 103 readings were obtained from at least three antibody concentrations. The readings were the average of  
 104 independent triplicates.

105           Testing the 63 recombinant Pertuzumab and Trastuzumab IgG1 variants with SpG which binds  
106 to CH2 and CH3 region, we found high consistency of the interactions between the two Pertuzumab  
107 and Trastuzumab IgG1 variants. Apart from showing similar KDs to the SpA, albeit with narrower  
108 KD ranges of  $0.23 - 0.87 \times 10^{-9}$  M and  $0.23 - 1.78 \times 10^{-9}$  M, respectively. There is a trend of  
109 Pertuzumab variants binding SpG better than the Trastuzumab counterparts. This slight difference,  
110 while unlikely significant, hints of CDR effects given that the variants differed only at a few residues  
111 in the CDRs.

112

113   **3.3 Bio-Layer Interferometry (BLI) measurement of recombinant IgG1 variants binding to**  
114   **Protein L (PpL)**

| Pertuzumab variants binding Protein L |                           |                             |                             | Trastuzumab variants binding Protein L |                           |                             |                             |
|---------------------------------------|---------------------------|-----------------------------|-----------------------------|----------------------------------------|---------------------------|-----------------------------|-----------------------------|
| Variable Pairings                     | KD (M, 10 <sup>-9</sup> ) | ka (1/Ms, 10 <sup>4</sup> ) | kd (1/s, 10 <sup>-4</sup> ) | Variable Pairings                      | KD (M, 10 <sup>-9</sup> ) | ka (1/Ms, 10 <sup>4</sup> ) | kd (1/s, 10 <sup>-4</sup> ) |
| κ1-H1                                 | 0.76                      | 15.40                       | 1.15                        | κ1-H1                                  | Not Produced              |                             |                             |
| κ1-H2                                 | 0.68                      | 13.90                       | 0.93                        | κ1-H2                                  |                           |                             |                             |
| κ1-H3                                 | 0.53                      | 18.09                       | 0.84                        | κ1-H3                                  |                           |                             |                             |
| κ1-H4                                 | 0.57                      | 15.23                       | 0.83                        | κ1-H4                                  |                           |                             |                             |
| κ1-H5                                 | Not Produced              |                             |                             | κ1-H5                                  | 0.11                      | 15.71                       | 0.17                        |
| κ1-H6                                 | Not Produced              |                             |                             | κ1-H6                                  | Not Produced              |                             |                             |
| κ1-H7                                 | 0.68                      | 16.05                       | 1.08                        | κ1-H7                                  | 0.14                      | 11.02                       | 0.16                        |
| κ2-H1*                                | 148.67                    | 6.36                        | 90.8                        | κ2-H1                                  | 124.41                    | 0.84                        | 9.49                        |
| κ2-H2+                                | 15.77                     | 1.68                        | 2.03                        | κ2-H2+                                 | 78.63                     | 2.29                        | 7.71                        |
| κ2-H3+                                | 19.91                     | 0.57                        | 0.84                        | κ2-H3                                  | Poor Response             |                             |                             |
| κ2-H4                                 | 14.4                      | 0.36                        | 0.3                         | κ2-H4                                  |                           |                             |                             |
| κ2-H5                                 | 0.93                      | 8.72                        | 0.81                        | κ2-H5                                  |                           |                             |                             |
| κ2-H6                                 | 0.72                      | 8.19                        | 0.59                        | κ2-H6+                                 | 190.4                     | 0.24                        | 3.53                        |
| κ2-H7*                                | 46.4                      | 2.19                        | 9.66                        | κ2-H7+                                 | 9.79                      | 1.51                        | 0.78                        |
| κ3-H1                                 | 38.03                     | 91.86                       | 86.08                       | κ3-H1                                  | 17.77                     | 11.68                       | 20.54                       |
| κ3-H2                                 | 25.42                     | 52.09                       | 127.73                      | κ3-H2                                  | 3.67                      | 7.63                        | 2.58                        |
| κ3-H3                                 | 29.02                     | 48.16                       | 132.1                       | κ3-H3                                  | 4.34                      | 51.2                        | 21.33                       |
| κ3-H4                                 | 5.55                      | 53.95                       | 6.99                        | κ3-H4                                  | 5.5                       | 29.5                        | 15.52                       |
| κ3-H5                                 | 16.85                     | 72.65                       | 70.21                       | κ3-H5                                  | 4.54                      | 49.16                       | 22.25                       |
| κ3-H6                                 | 23.21                     | 50.68                       | 85                          | κ3-H6                                  | 9.04                      | 15.37                       | 13.53                       |
| κ3-H7                                 | 17.66                     | 59.87                       | 74.33                       | κ3-H7                                  | 5.08                      | 46.18                       | 23.36                       |
| κ4-H1                                 | 74.56                     | 18.23                       | 123                         | κ4-H1                                  | 14.18                     | 9.15                        | 12.78                       |
| κ4-H2                                 | 37.05                     | 24.79                       | 87.04                       | κ4-H2                                  | Not Produced              |                             |                             |
| κ4-H3                                 | 13.09                     | 22.76                       | 19.45                       | κ4-H3                                  | 9.54                      | 17.19                       | 16.06                       |
| κ4-H4                                 | 13.66                     | 26.24                       | 20.37                       | κ4-H4                                  | 11.57                     | 16.95                       | 19.57                       |
| κ4-H5                                 | 54.38                     | 12                          | 64.34                       | κ4-H5                                  | 7.22                      | 20.05                       | 14.4                        |
| κ4-H6                                 | 23.49                     | 31.68                       | 47.04                       | κ4-H6                                  | 13.03                     | 14.32                       | 18.55                       |
| κ4-H7                                 | 34.95                     | 20.99                       | 65.46                       | κ4-H7                                  | 10.31                     | 20.34                       | 19.79                       |
| κ5-H1                                 | Not Produced              |                             |                             | κ5-H1                                  | Not Produced              |                             |                             |
| κ5-H2                                 | Not Produced              |                             |                             | κ5-H2                                  | Not Produced              |                             |                             |
| κ5-H3                                 | 13.58                     | 10.69                       | 13.93                       | κ5-H3                                  | 1.75                      | 10.8                        | 1.85                        |
| κ5-H4                                 | Not Produced              |                             |                             | κ5-H4                                  | Not Produced              |                             |                             |
| κ5-H5                                 | Not Produced              |                             |                             | κ5-H5                                  | Not Produced              |                             |                             |
| κ5-H6                                 | Not Produced              |                             |                             | κ5-H6                                  | Not Produced              |                             |                             |
| κ5-H7                                 | 13.88                     | 18.87                       | 23.5                        | κ5-H7                                  | Not Produced              |                             |                             |
| κ6-H1                                 | Poor Response             |                             |                             | κ6-H1+                                 | 14.93                     | 5.14                        | 7.53                        |
| κ6-H2                                 |                           |                             |                             | κ6-H2                                  | Not Produced              |                             |                             |
| κ6-H3                                 |                           |                             |                             | κ6-H3*                                 | 29.62                     | 6.07                        | 10.81                       |
| κ6-H4*                                | 43.46                     | 3.81                        | 10.43                       | κ6-H4*                                 | 74.9                      | 1.65                        | 8.96                        |
| κ6-H5+                                | 15.79                     | 1.77                        | 2.8                         | κ6-H5*                                 | 14.84                     | 16.49                       | 11.17                       |
| κ6-H6                                 | Not Produced              |                             |                             | κ6-H6*                                 | 82.16                     | 1.28                        | 8.36                        |
| κ6-H7                                 | 40.69                     | 0.31                        | 0.8                         | κ6-H7                                  | 60.37                     | 1.77                        | 9.83                        |

115

116 Figure 3. BLI measurements (KD, ka and kd) of Pertuzumab and Trastuzumab Vκ1-6 and VH1-7  
 117 permutation binding to immobilized SpG biosensor. “Not Produced” denotes that there was  
 118 insufficient antibody production for the variants despite numerous large-scale transfections. “Poor  
 119 response” indicates that the particular IgG1 pairing was unable to give response rates within the  
 120 detection limit across all concentrations. \* denotes readings that were derived from two IgG1



121 concentrations. + denotes represent readings generated derived from only one IgG1 concentration.  
122 All other readings were obtained from at least three concentrations. The readings were the average of  
123 independent triplicates.

124 From the total 63 permutations IgG1 variants consisting of 34 Pertuzumab and 29  
125 Trastuzumab permutations of the grafted V $\kappa$ 1-6 and VH1-7 on PpL, our systematic and holistic  
126 investigation of IgG1s to PpL showed non-canonical results of interactions with other V $\kappa$  families  
127 and a contributory role of VH-FWR and complementarity-determining regions (CDRs) to the  
128 interaction.

129 As a control for expected superantigen interactions, the Pertuzumab IgG1s of V $\kappa$ 1, 3 and 4  
130 interacted with PpL with V $\kappa$ 1 showing the lowest KD range ( $0.53 - 0.76 \times 10^{-9}$  M) followed by V $\kappa$ 3  
131 ( $5.55 - 38.03 \times 10^{-9}$  M) and V $\kappa$ 4 ( $13.09 - 74.56 \times 10^{-9}$  M). The V $\kappa$ 1 findings were consistent with  
132 previous literature (Åkerström and Björck, 1989;Rodrigo et al., 2015;Su et al., 2017). The lower  
133 equilibrium dissociation constants (KDs) of the V $\kappa$ 3 and 4 were due to the lower dissociation rates  
134 (kd) despite the higher association rates (ka) than V $\kappa$ 1. This trend was also observed for the  
135 Trastuzumab IgG1s with its V $\kappa$ 1 showing the lowest KD range ( $0.11 \& 0.14 \times 10^{-9}$  M) followed by  
136 V $\kappa$ 3 ( $3.67 - 17.77 \times 10^{-9}$  M) and 4 ( $7.22 - 14.18 \times 10^{-9}$  M). It should be noted that Trastuzumab  
137 IgG1s showed lower and a narrower KD range than the Pertuzumab V $\kappa$ -VH equivalents suggesting  
138 effects from the CDRs which were what differed between the two sets of IgG1s.

139 Interestingly, certain Pertuzumab VHs paired with V $\kappa$ 2, 5 and 6 exhibited interactions with  
140 PpL. Amongst these V $\kappa$  families, Pertuzumab variants V $\kappa$ 5 ( $13.58 \& 13.88 \times 10^{-9}$  M), 6 ( $15.79 -$   
141  $43.46 \times 10^{-9}$  M) and certain V $\kappa$ 2 permutations (VH2-4 and 7,  $14.4 - 46.4 \times 10^{-9}$  M) had KDs  
142 comparable to V $\kappa$ 3 and 4 permutations ( $5.55 - 74.56 \times 10^{-9}$  M). PertuzumabV $\kappa$ 2 paired with VH5  
143 and 6 ( $0.93$  and  $0.72 \times 10^{-9}$  M, respectively) had KDs comparable to V $\kappa$ 1 ( $0.53 - 0.76 \times 10^{-9}$  M) while  
144 V $\kappa$ 2 paired with VH1 had the highest KD (poorest binding) of  $148.67 \times 10^{-9}$  M. There were also non-  
145 binding IgG1s of the Pertuzumab V $\kappa$ 6 permutation with VH1-3 (Poor Response) despite measurable  
146 responses when paired with VH4, 5 and 7.

147 Interesting, the Pertuzumab trends were largely repeated in the Trastuzumab IgG1s where KDs  
148 of V $\kappa$ 5 ( $1.75 \times 10^{-9}$  M) and 6 ( $14.84 - 82.16 \times 10^{-9}$  M) and V $\kappa$ 2 paired with VH2 & 7 ( $78.63 \& 9.79$   
149  $\times 10^{-9}$  M, respectively) had KD values comparable to V $\kappa$ 3 and 4 ( $3.67 - 14.18 \times 10^{-9}$  M).  
150 Trastuzumab V $\kappa$ 2 paired with VH1 & 6 had the highest KD (poorest interaction) at  $124.41 \& 190.4 \times$   
151  $10^{-9}$  M, respectively. The non-binders were Trastuzumab V $\kappa$ 2 paired with VH3 - 5 (Poor Response)  
152 rather than in V $\kappa$ 6 family observed for Pertuzumab. These differences demonstrated a role of the  
153 CDRs and a significant contributory role of VH in PpL engagement.

154

## 155 4 Discussion

156 We set out to investigate the interactions of superantigens Protein A, G and L systematically  
157 and holistically with the various regions of IgG1 antibodies. By using CDRs of Pertuzumab and  
158 Trastuzumab grafted onto V $\kappa$ 1-6 and VH1-7 FWRs and pairing them within the two antibody  
159 models, measurements to the antibody superantigens showed no major differences for SpA between  
160 Pertuzumab and Trastuzumab IgG1 variants (Figure 1). This was expected given that SpA bound  
161 IgG1s predominantly at the CH2-CH3 regions (Deisenhofer, 1981) with some contributions from the  
162 VH3 framework (Su et al., 2021) that is also observed here to a lesser extent where the V $\kappa$  chains  
163 paired with VH3 showed a slightly lower KD measurement compared to the rest of the variants. Yet,

164 this difference is notably less pronounced compared to our previous work on IgEs (Su et al., 2021)  
165 with the same  $V_{\kappa}$ -VH where the VH3-CDR2 S58 residue had a more significant role in SpA binding  
166 for IgEs.

167 With respect to SpG interaction, no notable differences in KDs (Figure 2) were observed  
168 among the 63 IgG1 variants. As was with SpA, which shared an overlapping binding site on the  
169 CH2-CH3 region of IgGs (Kato et al., 1995), there was in fact a narrower range that we attributed to  
170 the lack of interference from the V-regions present for SpA. While SpG was previously reported  
171 (Choe et al., 2016) to bind to IgG1 better than SpA, this trend was more pronounced in our study.

172 Measurements of PpL interactions to Pertuzumab and Trastuzumab variants expectedly showed  
173 that VHs paired with  $V_{\kappa}1, 3$  and 4 to have KDs as per previously reported (Nilson et al., 1992; Su et  
174 al., 2017). Surprisingly, we found non-canonical interaction of PpL with  $V_{\kappa}2$  that were previously  
175 determined to not bind PpL (Nilson et al., 1992) while there is no report of  $V_{\kappa}5$  & 6 at the time of  
176 writing. In our own work involving light chain productions alone, we also affirmed that these  
177 secreted  $V_{\kappa}2, 5$  and 6 light chain dimers did not interact with PpL on the same BLI experiments  
178 (Supplementary Figure 1). Notable binders to PpL are: Pertuzumab  $V_{\kappa}2 - VH1-7$ ;  $V_{\kappa}5 - VH3$  & 7;  
179  $V_{\kappa}6 - VH4, 5$  & 6; Trastuzumab  $V_{\kappa}2 - VH1, 2, 5$  & 6;  $V_{\kappa}5 - VH3$ ;  $V_{\kappa}6 - VH1, 3-7$  (Figure 3).

180 Although the novel  $V_{\kappa}$  IgG1s bound PpL showed comparable KDs, it should be noted that the  
181 KDs were calculated from one (+ in Figure 3) or two (\* in Figure 3) antibody concentrations,  
182 generally from the highest concentrations (100 nM and below) of the Ig variant. The notable  
183 exceptions were that of Pertuzumab  $V_{\kappa}2 - VH4-6$ ,  $V_{\kappa}5 - VH3$  & 7,  $V_{\kappa}6 - VH6$ , Trastuzumab  $V_{\kappa}2 -$   
184  $VH1$ ,  $V_{\kappa}5 - VH3$ ,  $V_{\kappa}6 - VH7$  with KDs calculated from at least three concentrations. Interestingly,  
185 two variants: Pertuzumab  $V_{\kappa}2 - VH5$  & 6 showed KDs comparable to  $V_{\kappa}1 - VHs$  values.

186 The unexpected IgG1 variants interacting with PpL suggested a combined VH- $V_{\kappa}$  induced  
187 binding site to PpL that may be similar to the non-canonical binding of IgEs to Nickel (Su et al.,  
188 2021) in our previous work using the same V-regions. In fact, the IgG1s were validated with the  
189 expected interactions to SpA and SpG here, and also with the Fc $\gamma$ 2A and Her2 in our previous work  
190 (Ling et al., 2018). Given the lack of interactions between  $V_{\kappa} 2, 5$  and 6 with PpL, and the lack of  
191 consistency between the Trastuzumab and Pertuzumab variants where for Pertuzumab, the non-  
192 binders exist for Pertuzumab  $V_{\kappa}6 - VH1-3$  and Trastuzumab  $V_{\kappa}2 - VH3-5$  (labelled as “Poor  
193 Response” pairs in Figure 3), the PpL interaction is certainly beyond V-region pairings alone.

194 With the differences between the Pertuzumab and Trastuzumab which share very similar V-  
195 regions, our findings further demonstrate the need for a design thinking (Ling et al., 2020a) approach  
196 involving holistic antibody investigations approach (Phua et al., 2019). Such an approach allowed  
197 detailed investigations for unexpected interactions between the antibodies with other proteins that can  
198 have notable immune effects, as was with our unexpected findings of IgAs binding to SpG (Ling et  
199 al., 2021). With relevance to the development of therapeutics where a personalized antibody  
200 approach may be beneficial to avoid unwanted side effects, such interactions may also be engineered  
201 in for purification purposes.

202

## 203 **5 Conflict of Interest**

204 *The authors declare that the research was conducted in the absence of any commercial or*  
205 *financial relationships that could be construed as a potential conflict of interest.*

206

## 207 **6 Author Contributions**

208 Conceptualization, W.L.L. and S.K-E.G.

209 Methodology, W.L.L. and S.K-E.G.

210 Investigation, W.L.L. and S.K-E.G

211 Validation, J.Y.Y.

212 Writing – Original Draft, W.L.L. and S.K-E.G

213 Writing – Review & Editing, W.L.L., Y.L.N. and S.K-E.G

214 Funding Acquisition, S.K-E.G.

215 Supervision, S.K-E.G., Y.L.N. and A.W.

216

## 217 **7 Funding**

218 This work was partially supported by the Joint Council Office, Agency for Science,  
219 Technology, and Research, Singapore under Grant number JCO1334i00050 and the National  
220 Research Foundation (NRF) Singapore grant to Experimental Drug Development Centre (EDDC).

221

## 222 **8 Acknowledgments**

223 This is a short text to acknowledge the contributions of specific colleagues, institutions, or  
224 agencies that aided the efforts of the authors.

225

## 226 **9 References**

227 Åkerström, B., and Björck, L. (1989). Protein L: An Immunoglobulin Light Chain-binding Bacterial  
228 Protein: Characterization of binding and physicochemical properties \*. *Journal of Biological*  
229 *Chemistry* 264, 19740-19746.

230 Chan, W.-T., Verma, Chandra s., Lane, David p., and Gan, Samuel k.-E. (2013). A comparison and  
231 optimization of methods and factors affecting the transformation of Escherichia coli.  
232 *Bioscience Reports* 33.

233 Choe, W., Durgannavar, T.A., and Chung, S.J. (2016). Fc-Binding Ligands of Immunoglobulin G:  
234 An Overview of High Affinity Proteins and Peptides. *Materials (Basel, Switzerland)* 9, 994.

235 Deacy, A.M., Gan, S.K.-E., and Derrick, J.P. (2021). Superantigen Recognition and Interactions:  
236 Functions, Mechanisms and Applications. *Frontiers in Immunology* 12.

- 237 Deisenhofer, J. (1981). Crystallographic refinement and atomic models of a human Fc fragment and  
238 its complex with fragment B of protein A from *Staphylococcus aureus* at 2.9- and 2.8-Å  
239 resolution. *Biochemistry* 20, 2361-2370.
- 240 Gan, S.K.P., S.; Yeo, J.Y. (2021). Sagacious Epitope Selection for Vaccines, and Both Antibody-  
241 Based Therapeutics and Diagnostics: Tips From Virology and Oncology. *Preprints*.
- 242 Grov, A., Myklestad, B., and Oeding, P. (1964). IMMUNOCHEMICAL STUDIES ON ANTIGEN  
243 PREPARATIONS FROM *STAPHYLOCOCCUS AUREUS*. *Acta Pathologica*  
244 *Microbiologica Scandinavica* 61, 588-596.
- 245 Haraldsson, Á., Kock-Jansen, M.J.H., Jaminon, M., V Eck-Arts, P.B.J.M., De Boo, T., Weemaes,  
246 C.M.R., and Bakkeren, J.a.J.M. (1991). Determination of Kappa and Lambda Light Chains in  
247 Serum Immunoglobulins G, A and M. *Annals of Clinical Biochemistry* 28, 461-466.
- 248 Janeway, C.A., Travers, P., Walport, M., and Capra, D.J. (2001). *Immunobiology*. Taylor & Francis  
249 Group UK: Garland Science.
- 250 Kato, K., Lian, L.-Y., Barsukov, I.L., Derrick, J.P., Kim, H., Tanaka, R., Yoshino, A., Shiraishi, M.,  
251 Shimada, I., Arata, Y., and Roberts, G.C.K. (1995). Model for the complex between protein G  
252 and an antibody Fc fragment in solution. *Structure* 3, 79-85.
- 253 Ling, W.-L., Lua, W.-H., and Gan, S.K.-E. (2020a). Sagacity in antibody humanization for  
254 therapeutics, diagnostics and research purposes: considerations of antibody elements and their  
255 roles. *Antibody Therapeutics* 3, 71-79.
- 256 Ling, W.-L., Lua, W.-H., Poh, J.-J., Yeo, J.Y., Lane, D.P., and Gan, S.K.-E. (2018). Effect of VH-  
257 VL Families in Pertuzumab and Trastuzumab Recombinant Production, Her2 and FcγIIA  
258 Binding. *Frontiers in Immunology* 9.
- 259 Ling, W.-L., Su, C.T.-T., Lua, W.-H., Poh, J.-J., Ng, Y.-L., Wipat, A., and Gan, S.K.-E. (2020b).  
260 Essentially Leading Antibody Production: An Investigation of Amino Acids, Myeloma, and  
261 Natural V-Region Signal Peptides in Producing Pertuzumab and Trastuzumab Variants.  
262 *Frontiers in Immunology* 11.
- 263 Ling, W.-L., Su, C.T.-T., Lua, W.-H., Yeo, J.Y., Poh, J.-J., Ng, Y.-L., Wipat, A., and Gan, S.K.-E.  
264 (2021). Engaging the 'A' Class Antibody: Variable-Heavy (VH) region influencing  
265 IgA1&#223;2 engagement of FcαRI and superantigen proteins G, A, and L. *bioRxiv*,  
266 2021.2009.2027.461897.
- 267 Lua, W.-H., Ling, W.-L., Yeo, J.Y., Poh, J.-J., Lane, D.P., and Gan, S.K.-E. (2018). The effects of  
268 Antibody Engineering CH and CL in Trastuzumab and Pertuzumab recombinant models:  
269 Impact on antibody production and antigen-binding. *Scientific Reports* 8, 718.
- 270 Lua, W.-H., Su, C.T.-T., Yeo, J.Y., Poh, J.-J., Ling, W.-L., Phua, S.-X., and Gan, S.K.-E. (2019a).  
271 Role of the IgE variable heavy chain in Fc&#x3b5;RI&#x3b1; and superantigen binding in  
272 allergy and immunotherapy. *Journal of Allergy and Clinical Immunology* 144, 514-523.e515.
- 273 Lua, W.-H., Su, C.T.-T., Yeo, J.Y., Poh, J.-J., Ling, W.-L., Phua, S.-X., and Gan, S.K.-E. (2019b).  
274 Role of the IgE variable heavy chain in FcεRIα and superantigen binding in allergy and  
275 immunotherapy. *Journal of Allergy and Clinical Immunology* 144, 514-523.e515.
- 276 Nilson, B.H., Solomon, A., Björck, L., and Akerström, B. (1992). Protein L from *Peptostreptococcus*  
277 *magnus* binds to the kappa light chain variable domain. *J Biol Chem* 267, 2234-2239.

- 278 Phua, S.-X., Chan, K.-F., Su, Chinh t.-T., Poh, J.-J., and Gan, Samuel k.-E. (2019). Perspective: The  
279 promises of a holistic view of proteins—impact on antibody engineering and drug discovery.  
280 *Bioscience Reports* 39.
- 281 Rodrigo, G., Gruvegård, M., and Van Alstine, J.M. (2015). Antibody Fragments and Their  
282 Purification by Protein L Affinity Chromatography. *Antibodies* 4, 259-277.
- 283 Samsudin, F., Yeo, J.Y., Gan, S.K.-E., and Bond, P.J. (2020). Not all therapeutic antibody isotypes  
284 are equal: the case of IgM versus IgG in Pertuzumab and Trastuzumab. *Chemical Science* 11,  
285 2843-2854.
- 286 Sasso, E.H., Silverman, G.J., and Mannik, M. (1991). Human IgA and IgG F(ab')<sub>2</sub> that bind to  
287 staphylococcal protein A belong to the VHIII subgroup. *The Journal of Immunology* 147,  
288 1877-1883.
- 289 Sjöbring, U., Björck, L., and Kastern, W. (1991). Streptococcal protein G. Gene structure and protein  
290 binding properties. *J Biol Chem* 266, 399-405.
- 291 Spaulding, A.R., Salgado-Pabón, W., Kohler, P.L., Horswill, A.R., Leung, D.Y.M., and Schlievert,  
292 P.M. (2013). Staphylococcal and Streptococcal Superantigen Exotoxins. *Clinical*  
293 *Microbiology Reviews* 26, 422-447.
- 294 Su, C.T.-T., Ling, W.-L., Lua, W.-H., Poh, J.-J., and Gan, S.K.-E. (2017). The role of Antibody V $\kappa$   
295 Framework 3 region towards Antigen binding: Effects on recombinant production and Protein  
296 L binding. *Scientific Reports* 7, 3766.
- 297 Su, C.T.-T., Lua, W.-H., Ling, W.-L., and Gan, S.K.-E. (2018). Allosteric Effects between the  
298 Antibody Constant and Variable Regions: A Study of IgA Fc Mutations on Antigen Binding.  
299 *Antibodies* 7, 20.
- 300 Su, C.T.-T., Lua, W.-H., Poh, J.-J., Ling, W.-L., Yeo, J.Y., and Gan, S.K.-E. (2021). Molecular  
301 Insights of Nickel Binding to Therapeutic Antibodies as a Possible New Antibody  
302 Superantigen. *Frontiers in Immunology* 12.

303

## 304 **10 Data Availability Statement**

305 The datasets GENERATED/ANALYZED for this study is available upon request.

306

## 307 **Figure Legends**

308 Figure 1. BLI measurements (KD,  $k_a$  and  $k_d$ ) of Pertuzumab and Trastuzumab V $\kappa$ 1-6 and VH1-7  
309 permutation binding to immobilized SpA biosensor. “Not Produced” denotes that there was  
310 insufficient antibody production for the variant despite numerous large-scale transfections. All  
311 readings were obtained from at least three antibody concentrations. The readings were the average of  
312 independent triplicates.

313 Figure 2. BLI measurements (KD,  $k_a$  and  $k_d$ ) of Pertuzumab and Trastuzumab V $\kappa$ 1-6 and VH1-7  
314 permutation binding to immobilized SpG biosensor. “Not Produced” denotes that there was  
315 insufficient antibody production for the variants despite numerous large-scale transfections. All

316 readings were obtained from at least three antibody concentrations. The readings were the average of  
317 independent triplicates.

318 Figure 3. BLI measurements (KD,  $k_a$  and  $k_d$ ) of Pertuzumab and Trastuzumab V $\kappa$ 1-6 and VH1-7  
319 permutation binding to immobilized SpG biosensor. “Not Produced” denotes that there was  
320 insufficient antibody production for the variants despite numerous large-scale transfections. “Poor  
321 response” indicates that the particular IgG1 pairing was unable to give response rates within the  
322 detection limit across all concentrations. \* denotes readings that were derived from two IgG1  
323 concentrations. + denotes represent readings generated derived from only one IgG1 concentration.  
324 All other readings were obtained from at least three concentrations. The readings were the average of  
325 independent triplicates.
